# Supplementary material for: Phenolic Profiling and In-Vitro Bioactivities of Corn (Zea mays L.) Tassel Extracts by Combining Enzyme-Assisted Extraction
Source: MDPI journal article supplement (doi:10.3390/foods11142145), 2022-07-20
Supplement: s1 [file s1]

**Table S1.** Central composite design and response for TPC value in corn tassel extract by cellulase-assisted method

| Run | Incubation time (h,<br>$\chi^1$ ) | Cellulase concentration (U/g,<br>$\chi^2$ ) | TPC (mg/g) |
|-----|-----------------------------------|---------------------------------------------|------------|
| 1   | 36                                | 1500                                        | 9.49       |
| 2   | 12                                | 1000                                        | 6.93       |
| 3   | 12                                | 1000                                        | 7.01       |
| 4   | 60                                | 500                                         | 7.79       |
| 5   | 60                                | 2500                                        | 8.94       |
| 6   | 48                                | 500                                         | 8.25       |
| 7   | 12                                | 2500                                        | 6.87       |
| 8   | 36                                | 2500                                        | 9.66       |
| 9   | 12                                | 500                                         | 5.98       |
| 10  | 36                                | 500                                         | 8.82       |
| 11  | 36                                | 1000                                        | 9.29       |
| 12  | 36                                | 500                                         | 8.93       |
| 13  | 36                                | 1000                                        | 9.21       |
| 14  | 36                                | 1500                                        | 9.58       |
| 15  | 12                                | 500                                         | 5.96       |
| 16  | 60                                | 500                                         | 7.80       |
| 17  | 60                                | 2500                                        | 8.90       |
| 18  | 12                                | 2500                                        | 7.87       |
| 19  | 36                                | 1500                                        | 9.48       |
| 20  | 12                                | 500                                         | 5.67       |
| 21  | 36                                | 1500                                        | 9.50       |
| 22  | 60                                | 1500                                        | 8.81       |
| 23  | 12                                | 2500                                        | 7.87       |
| 24  | 24                                | 1500                                        | 8.89       |
| 25  | 48                                | 1000                                        | 9.02       |
| 26  | 36                                | 1500                                        | 9.49       |
| 27  | 36                                | 1000                                        | 9.24       |
| 28  | 12                                | 2500                                        | 7.88       |
| 29  | 48                                | 2500                                        | 9.29       |
| 30  | 24                                | 2500                                        | 8.28       |

**Table S2.** Central composite design and response for TPC value in corn tassel extract by protease-assisted method

| Run | Incubation time (h,<br>$\chi^1$ ) | Protease concentration (U/g,<br>$\chi^2$ ) | TPC (mg/g) |
|-----|-----------------------------------|--------------------------------------------|------------|
| 1   | 36.00                             | 1500.00                                    | 7.93       |
| 2   | 12.00                             | 500.00                                     | 5.82       |
| 3   | 60.00                             | 500.00                                     | 7.81       |
| 4   | 24.00                             | 500.00                                     | 6.65       |
| 5   | 60.00                             | 2500.00                                    | 8.30       |
| 6   | 48.00                             | 500.00                                     | 8.40       |
| 7   | 12.00                             | 2500.00                                    | 6.42       |
| 8   | 36.00                             | 2500.00                                    | 7.83       |
| 9   | 12.00                             | 500.00                                     | 4.75       |
| 10  | 36.00                             | 500.00                                     | 8.69       |
| 11  | 36.00                             | 500.00                                     | 8.15       |
| 12  | 36.00                             | 1000.00                                    | 8.20       |
| 13  | 36.00                             | 500.00                                     | 8.52       |
| 14  | 36.00                             | 1500.00                                    | 7.80       |
| 15  | 12.00                             | 500.00                                     | 4.67       |
| 16  | 60.00                             | 500.00                                     | 7.78       |
| 17  | 24.00                             | 2500.00                                    | 6.91       |
| 18  | 12.00                             | 2500.00                                    | 5.19       |
| 19  | 36.00                             | 1500.00                                    | 7.94       |
| 20  | 12.00                             | 500.00                                     | 5.17       |
| 21  | 36.00                             | 1500.00                                    | 7.92       |
| 22  | 60.00                             | 1500.00                                    | 7.71       |
| 23  | 12.00                             | 2500.00                                    | 5.87       |
| 24  | 24.00                             | 1500.00                                    | 6.79       |
| 25  | 36.00                             | 1500.00                                    | 8.00       |
| 26  | 36.00                             | 1500.00                                    | 7.91       |
| 27  | 36.00                             | 1000.00                                    | 8.011      |
| 28  | 12.00                             | 2500.00                                    | 5.83       |
| 29  | 48.00                             | 2000.00                                    | 7.90       |
| 30  | 48.00                             | 2000.00                                    | 7.96       |

**Table S3.** Central composite design and response for TPC value in corn tassel extract by mixed enzyme-assisted method

| Run | Temperature<br>( $\chi_1$ ) | (°C)<br>pH ( $\chi_2$ ) | TPC (mg/g) |
|-----|-----------------------------|-------------------------|------------|
| 1   | 40.00                       | 5.00                    | 10.72      |
| 2   | 47.50                       | 6.00                    | 7.84       |
| 3   | 47.50                       | 5.00                    | 8.04       |
| 4   | 47.50                       | 6.00                    | 7.87       |
| 5   | 40.00                       | 6.00                    | 10.49      |
| 6   | 47.50                       | 6.00                    | 7.90       |
| 7   | 55.00                       | 7.00                    | 6.95       |
| 8   | 55.00                       | 5.00                    | 7.37       |
| 9   | 47.50                       | 6.00                    | 7.83       |
| 10  | 40.00                       | 7.00                    | 10.26      |
| 11  | 55.00                       | 6.00                    | 7.11       |
| 12  | 47.50                       | 7.00                    | 7.77       |
| 13  | 47.50                       | 6.00                    | 7.90       |

**Table S4.** Regression coefficients of the fitted second order polynomials representing the relationship between the responses and variables

| Factor                | Cellulase                 |                   |             |                     | Protease                     |                   |         |                     | Cellulase-protease mixture   |                       |             |                     |
|-----------------------|---------------------------|-------------------|-------------|---------------------|------------------------------|-------------------|---------|---------------------|------------------------------|-----------------------|-------------|---------------------|
|                       | Coefficient<br>s Estimate | Sum of<br>Squares | F-<br>Value | P-value<br>Prob > F | Coefficient<br>s<br>Estimate | Sum of<br>Squares | F-Value | P-value<br>Prob > F | Coefficient<br>s<br>Estimate | Sum of<br>Square<br>s | F-<br>Value | P-value<br>Prob > F |
| Intercept             | 9.57                      | 37.59             | 84.84       | < 0.0001            | 7.89                         | 38.63             | 55.69   | < 0.0001            | 7.87                         | 19.87                 | 1873.48     | < 0.0001            |
| $\chi^1$              | 0.76                      | 8.10              | 91.39       | < 0.0001            | 1.24                         | 17.00             | 122.56  | < 0.0001            | -1.67                        | 16.80                 | 7921.46     | < 0.0001            |
| $\chi^2$              | 0.57                      | 5.70              | 64.35       | < 0.0001            | 0.066                        | 0.062             | 0.45    | 0.5087              | -0.19                        | 0.22                  | 103.93      | < 0.0001            |
| $\chi^1 \chi^2$       | -0.15                     | 0.25              | 2.84        | 0.1049              | -0.18                        | 0.33              | 2.35    | 0.1381              | 0.010                        | 0.0004                | 0.19        | 0.6772              |
| $\chi^{1^2}$          | -1.47                     | 10.59             | 119.51      | < 0.0001            | -1.50                        | 9.85              | 70.99   | < 0.0001            | 0.93                         | 2.37                  | 1117.16     | < 0.0001            |
| $\chi^{2^2}$          | -0.56                     | 1.41              | 15.96       | 0.0005              | 0.29                         | 0.32              | 2.32    | 0.1408              | 0.031                        | 0.002                 | 1.27        | 0.2972              |
| Residual              |                           | 2.13              |             |                     |                              | 3.33              |         |                     |                              | 0.015                 |             |                     |
| Lack of Fit           |                           | 1.29              | 2.58        | 0.0508              |                              | 1.55              | 1.73    | 0.1662              |                              | 0.011                 | 3.29        | 0.1399              |
| Pure Error            |                           | 0.84              |             |                     |                              | 1.78              |         |                     |                              | 0.004                 |             |                     |
| Cor Total             |                           | 39.71             |             |                     |                              | 41.96             |         |                     |                              | 19.88                 |             |                     |
| Std. Dev.             |                           | 0.30              |             |                     |                              | 0.37              |         |                     |                              | 0.046                 |             |                     |
| Mean                  |                           | 8.36              |             |                     |                              | 7.23              |         |                     |                              | 8.31                  |             |                     |
| C.V. %                |                           | 3.56              |             |                     |                              | 5.15              |         |                     |                              | 0.55                  |             |                     |
| PRESS                 |                           | 3.43              |             |                     |                              | 6.94              |         |                     |                              | 0.11                  |             |                     |
| R <sup>2</sup>        |                           | 0.95              |             |                     |                              | 0.9206            |         |                     |                              | 0.9993                |             |                     |
| Adj- R <sup>2</sup>   |                           | 0.94              |             |                     |                              | 0.9041            |         |                     |                              | 0.9987                |             |                     |
| Pred - R <sup>2</sup> |                           | 0.91              |             |                     |                              | 0.8347            |         |                     |                              | 0.9943                |             |                     |
| Adeq                  |                           |                   |             |                     |                              |                   |         |                     |                              |                       |             |                     |
| Precision             |                           | 26.461            |             |                     |                              | 19.619            |         |                     |                              | 119.220               |             |                     |

$\chi^1$  and  $\chi^2$  refer to incubation time and enzyme concentration for cellulase or protease-assisted extraction, and incubation temperature and pH for cellulase - protease mixture-assisted extraction.

**Table S5.** Antibacterial activity of corn tassels extracts by different extraction methods.

| Bacteria             | Inhibition zone (mm) |                        |                       |                        |                        |                         |
|----------------------|----------------------|------------------------|-----------------------|------------------------|------------------------|-------------------------|
|                      | Negative control     | Positive control       | Ethanol               | Cellulase              | Protease               | Enzymatic mixture (1:1) |
| <i>B. cereus</i>     | 0                    | 10.5±0.50 <sup>a</sup> | 6.1±0.52 <sup>c</sup> | 9.0±0.50 <sup>b</sup>  | 8.7±0.58 <sup>b</sup>  | 10.5±0.50 <sup>a</sup>  |
| <i>Staph. Aureus</i> | 0                    | 11.8±0.76 <sup>a</sup> | 5.7±0.56 <sup>d</sup> | 9.0±0.50 <sup>c</sup>  | 8.8±0.76 <sup>c</sup>  | 10.2±0.44 <sup>b</sup>  |
| <i>E.coli</i>        | 0                    | 23.8±1.25 <sup>a</sup> | 7.9±0.27 <sup>d</sup> | 12.2±0.28 <sup>b</sup> | 10.5±0.50 <sup>c</sup> | 12.8±0.74 <sup>b</sup>  |
| <i>S. typhi</i>      | 0                    | 15.3±1.04 <sup>a</sup> | 6.8±0.42 <sup>d</sup> | 9.5±0.50 <sup>bc</sup> | 9.0±0.50 <sup>c</sup>  | 10.8±0.60 <sup>b</sup>  |
| <i>P. aeruginosa</i> | 0                    | 16.2±1.04 <sup>a</sup> | 7.1±0.38 <sup>e</sup> | 10.2±0.28 <sup>c</sup> | 9.3±0.28 <sup>d</sup>  | 11.5±0.50 <sup>b</sup>  |

Values are expressed as mean ± standard error (n=3). Different superscripts within each row are significantly different at  $P < 0.05$ . Negative control: DMSO, positive control: ceftriaxone.

**Table S6.** Antifungal activity of corn tassels extracts by different extraction methods.

| Fungi                   | Inhibition zone (mm) |                        |                       |                        |                       |                                  |
|-------------------------|----------------------|------------------------|-----------------------|------------------------|-----------------------|----------------------------------|
|                         | Negative control     | Positive control       | Ethanol               | Cellulase              | Protease              | cellulase-protease mixture (1:1) |
| <i>A. flavus</i>        | 0                    | 15.3±1.04 <sup>a</sup> | 6.1±0.26 <sup>d</sup> | 8.5±0.50 <sup>c</sup>  | 8.3±0.28 <sup>c</sup> | 9.0±0.50 <sup>b</sup>            |
| <i>A. parasiticus</i>   | 0                    | 18.2±1.08 <sup>a</sup> | 6.3±0.37 <sup>c</sup> | 8.8±0.36 <sup>b</sup>  | 8.5±0.50 <sup>b</sup> | 8.8±0.28 <sup>b</sup>            |
| <i>A. niger</i>         | 0                    | 21.2±0.76 <sup>a</sup> | 6.8±0.31 <sup>e</sup> | 9.2±0.28 <sup>c</sup>  | 8.3±0.58 <sup>d</sup> | 10.7±0.76 <sup>b</sup>           |
| <i>A. carbonarius</i>   | 0                    | 15.0±1.50 <sup>a</sup> | 7.2±0.51 <sup>d</sup> | 8.5±0.50 <sup>c</sup>  | 8.5±0.86 <sup>c</sup> | 9.7±0.76 <sup>b</sup>            |
| <i>A. ochraceus</i>     | 0                    | 14.8±0.76 <sup>a</sup> | 6.4±0.41 <sup>d</sup> | 8.5±0.50 <sup>c</sup>  | 8.3±0.58 <sup>c</sup> | 9.8±0.52 <sup>b</sup>            |
| <i>A. westerdijikii</i> | 0                    | 21.3±0.76 <sup>a</sup> | 7.1±0.32 <sup>e</sup> | 10.2±0.76 <sup>c</sup> | 9.3±0.28 <sup>d</sup> | 11.0±0.50 <sup>b</sup>           |
| <i>F. proliferatum</i>  | 0                    | 11.7±0.58 <sup>a</sup> | 6.6±0.48 <sup>c</sup> | 9.0±0.86 <sup>b</sup>  | 8.8±0.76 <sup>b</sup> | 9.0±1.00 <sup>b</sup>            |
| <i>P. verrucosum</i>    | 0                    | 20.0±1.00 <sup>a</sup> | 6.8±0.23 <sup>d</sup> | 9.8±1.04 <sup>b</sup>  | 8.8±0.76 <sup>c</sup> | 10.0±0.50 <sup>b</sup>           |

Values are expressed as mean ± standard error (n=3). Different superscripts within each row are significantly different at  $P < 0.05$ . Negative control: DMSO, positive control: ceftriaxone.

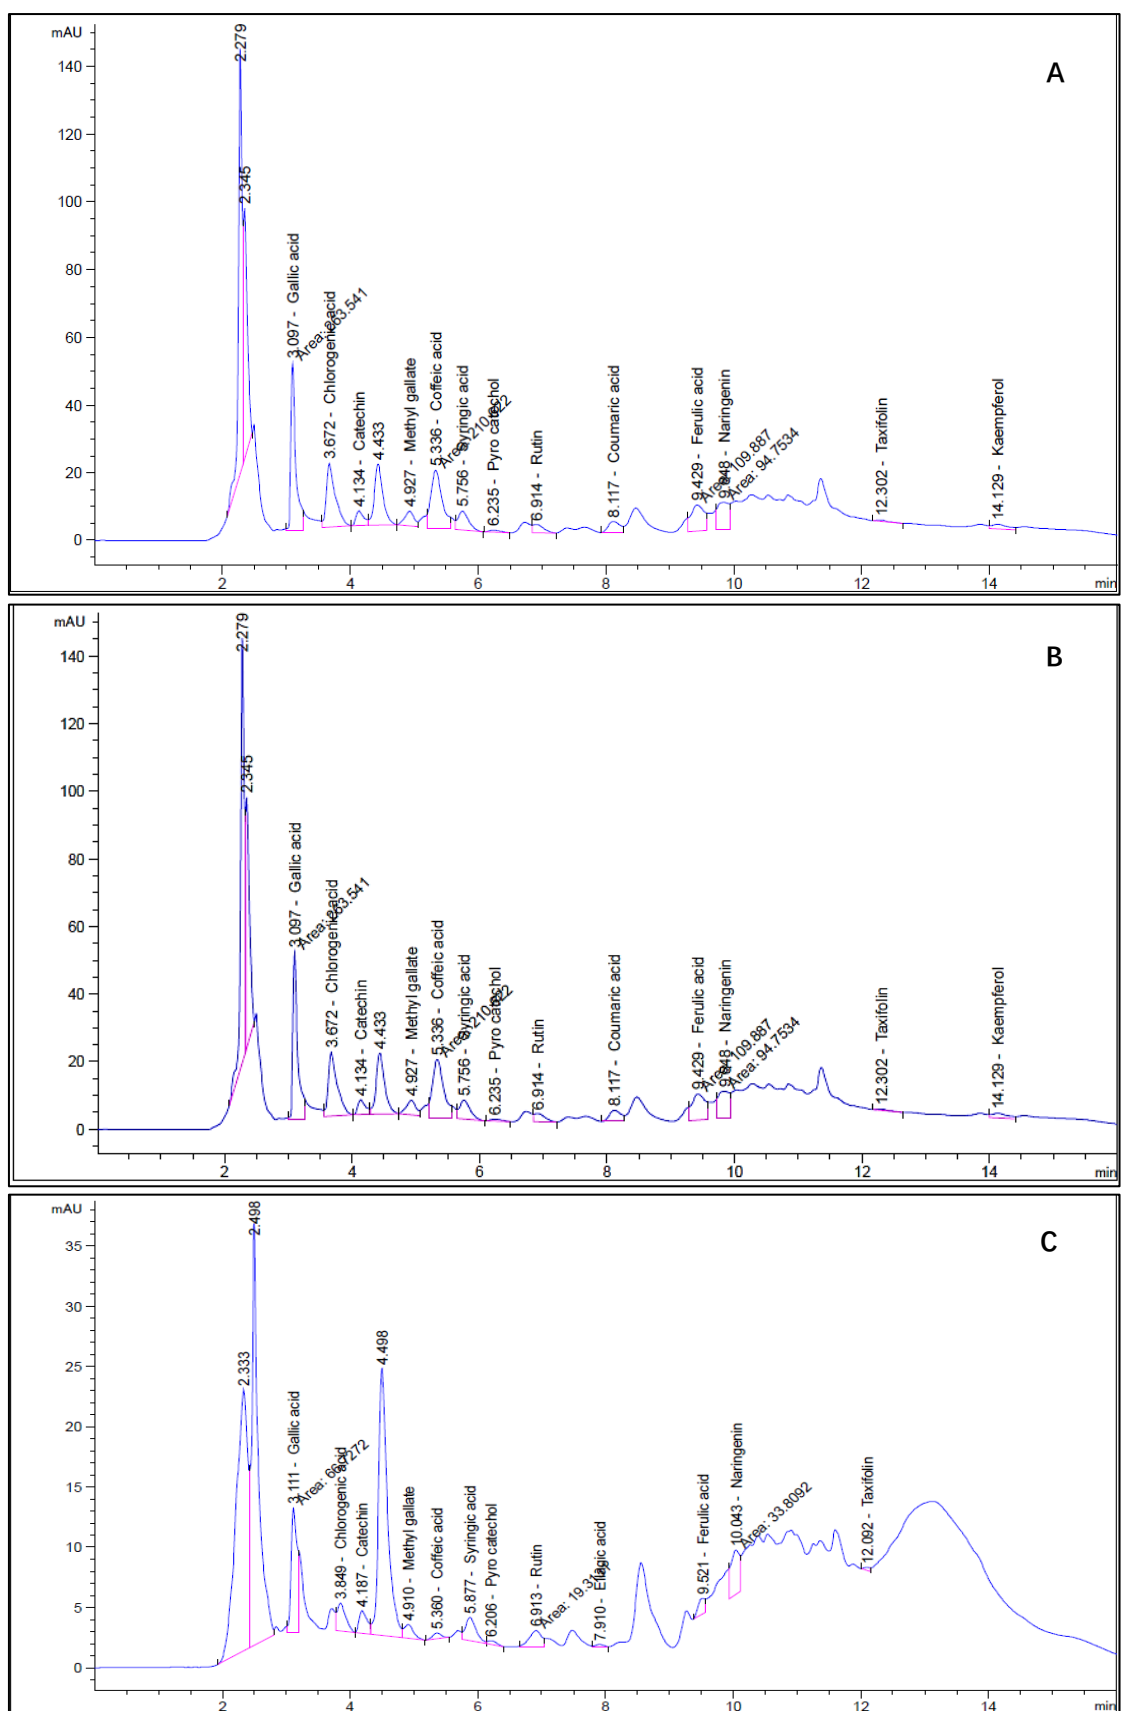

**Figure S1.** HPLC chromatograms for phenolic compounds in corn tassel extracts by enzyme assisted method. A: Cellulase; B: protease; C: cellulase-protease mixture (1:1).
